# Supplementary material for: Land use dynamics and urban development suitability: A geospatial analysis of Romania’s most urbanized county
Source: Research Square preprint supplement (doi:10.21203/rs.3.rs-6892590/v1), 2025-07-23
Supplement: Supplementary file 1 [file f0dce6dc83a96f259c703dfb.docx]

**Appendix A – Complete dataset of CLC classes and assigned suitability scores**

This appendix provides the full dataset of CLC classes with their respective suitability scores, based on the 2018 CLC dataset, as utilized in the suitability analysis for urban development in Constanța County.

| **CLC Code** | **Description** | **Suitability score** |
| --- | --- | --- |
| 111 | Continuous urban fabric | 1 |
| 112 | Discontinuous urban fabric | 2 |
| 121 | Industrial or commercial units | 1 |
| 122 | Road and rail networks and associated land | 1 |
| 123 | Port areas | 1 |
| 124 | Airports | 1 |
| 131 | Mineral extraction sites | 2 |
| 132 | Dump sites | 3 |
| 133 | Construction sites | 4 |
| 141 | Green urban areas | 5 |
| 142 | Sports and leisure facilities | 4 |
| 211 | Non-irrigated arable land | 3 |
| 213 | Rice fields | 3 |
| 221 | Vineyards | 3 |
| 222 | Fruit tree and berry plantations | 4 |
| 231 | Pastures | 4 |
| 242 | Complex cultivation patterns | 5 |
| 243 | Land principally occupied by agriculture, with significant areas of natural vegetation | 4 |
| 311 | Broad-leaved forest | 1 |
| 312 | Coniferous forest | 1 |
| 313 | Mixed forest | 1 |
| 321 | Natural grasslands | 5 |
| 324 | Transitional woodland-shrub | 5 |
| 331 | Beaches, dunes, sands | 2 |
| 411 | Inland marshes | 1 |
| 421 | Salt marshes | 1 |
| 511 | Water courses | 1 |
| 512 | Water bodies | 1 |
| 521 | Coastal lagoons | 1 |
| 523 | Sea and ocean | 1 |

**Appendix B: Conversion between CLC classes (1990–2000)**

This appendix presents the LULC conversions between 1990 and 2000 based on the CLC classification. Conversions involving a complete change of category (e.g., from agricultural to artificial land) are highlighted in bold for emphasis.

| **Class Code 1990** | **Class 1990 description** | **Class code 2000** | **Class 2000 description** |
| --- | --- | --- | --- |
| 121 | Industrial or commercial units | 112 | Discontinuous urban fabric |
| 133 | Construction sites | 112 | Discontinuous urban fabric |
| 133 | Construction sites | 121 | Industrial or commercial units |
| 133 | Construction sites | 142 | Sport and leisure facilities |
| **211** | **Non-irrigated arable land** | **112** | **Discontinuous urban fabric** |
| **211** | **Non-irrigated arable land** | **121** | **Industrial or commercial units** |
| **211** | **Non-irrigated arable land** | **131** | **Mineral extraction sites** |
| **211** | **Non-irrigated arable land** | **133** | **Construction sites** |
| **211** | **Non-irrigated arable land** | **142** | **Sport and leisure facilities** |
| 211 | Non-irrigated arable land | 231 | Pastures |
| 211 | Non-irrigated arable land | 242 | Complex cultivation patterns |
| 213 | Rice fields | 211 | Non-irrigated arable land |
| **221** | **Vineyards** | **133** | **Construction sites** |
| 221 | Vineyards | 211 | Non-irrigated arable land |
| 221 | Vineyards | 242 | Complex cultivation patterns |
| 221 | Vineyards | 243 | Land principally occupied by agriculture, with significant natural vegetation |
| **222** | **Fruit trees and berry plantations** | **112** | **Discontinuous urban fabric** |
| 222 | Fruit trees and berry plantations | 211 | Non-irrigated arable land |
| 222 | Fruit trees and berry plantations | 242 | Complex cultivation patterns |
| 222 | Fruit trees and berry plantations | 243 | Land principally occupied by agriculture, with significant natural vegetation |
| **231** | **Pastures** | **112** | **Discontinuous urban fabric** |
| **231** | **Pastures** | **121** | **Industrial or commercial units** |
| **231** | **Pastures** | **131** | **Mineral extraction sites** |
| **231** | **Pastures** | **133** | **Construction sites** |
| **231** | **Pastures** | **142** | **Sport and leisure facilities** |
| 231 | Pastures | 211 | Non-irrigated arable land |
| **231** | **Pastures** | **324** | **Transitional woodland/shrub** |
| **242** | **Complex cultivation patterns** | **112** | **Discontinuous urban fabric** |
| **242** | **Complex cultivation patterns** | **121** | **Industrial or commercial units** |
| **242** | **Complex cultivation patterns** | **133** | **Construction sites** |
| 311 | Broad-leaved forest | 324 | Transitional woodland/shrub |
| 321 | Natural grasslands | 311 | Broad-leaved forest |
| 324 | Transitional woodland/shrub | 311 | Broad-leaved forest |
| **411** | **Inland marshes** | **112** | **Discontinuous urban fabric** |
| **411** | **Inland marshes** | **211** | **Non-irrigated arable land** |

**Appendix C: Conversion between CLC classes (2000–2006)**This annex presents the LULC conversions between 2000 and 2006 based on the CLC classification. Conversions involving a complete change of category (e.g., from agricultural to artificial land) are highlighted in bold for emphasis.

| **Class Code 2000** | **Class 2000 description** | **Class code 2006** | **Class 2006 description** |
| --- | --- | --- | --- |
| 133 | Construction sites | 112 | Discontinuous urban fabric |
| 133 | Construction sites | 142 | Sport and leisure facilities |
| **211** | **Non-irrigated arable land** | **112** | **Discontinuous urban fabric** |
| **211** | **Non-irrigated arable land** | **121** | **Industrial or commercial units** |
| **211** | **Non-irrigated arable land** | **131** | **Mineral extraction sites** |
| **211** | **Non-irrigated arable land** | **133** | **Construction sites** |
| 211 | Non-irrigated arable land | 221 | Vineyards |
| **221** | **Vineyards** | **112** | **Discontinuous urban fabric** |
| **221** | **Vineyards** | **121** | **Industrial or commercial units** |
| 222 | Fruit trees and berry plantations | 211 | Non-irrigated arable land |
| **231** | **Pastures** | **112** | **Discontinuous urban fabric** |
| **231** | **Pastures** | **133** | **Construction sites** |
| 231 | Pastures | 221 | Vineyards |
| **243** | **Land principally occupied by agriculture, with significant natural vegetation** | **121** | **Industrial or commercial units** |
| 311 | Broad-leaved forest | 324 | Transitional woodland/shrub |
| 312 | Coniferous forest | 324 | Transitional woodland/shrub |
| 313 | Mixed forest | 324 | Transitional woodland/shrub |
| **331** | **Beaches, dunes, sands** | **112** | **Discontinuous urban fabric** |
| **331** | **Beaches, dunes, sands** | **133** | **Construction sites** |
